# Supplementary material for: Intact mangrove root electrodes for desalination
Source: Royal Society of Chemistry journal article supplement (doi:10.1039/c8ra09899a), 2019-01-01
Supplement: c8ra09899a1.pdf [file c8ra09899a1.pdf]

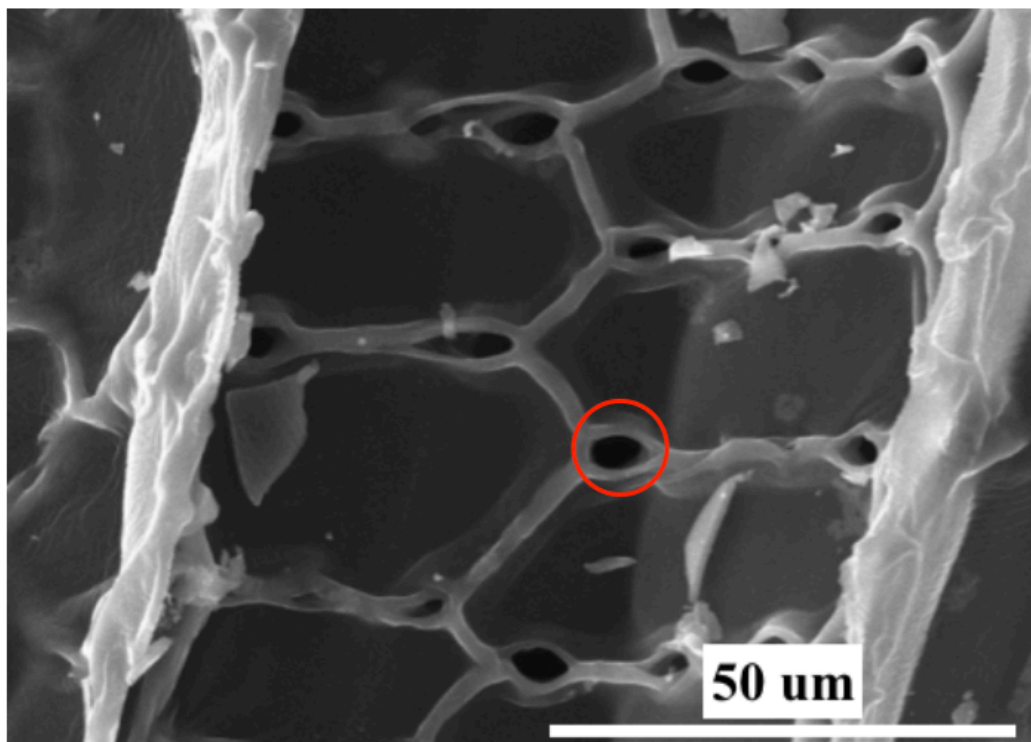

**Supplementary Figure 1 - Higher magnification scanning electron microscopy (SEM) longitudinal image showing interconnecting pores in tubular structures (i.e. - red circle) of carbonized aerenchyma tissue which enables radial water transport in carbonized red mangrove root (RMR).**

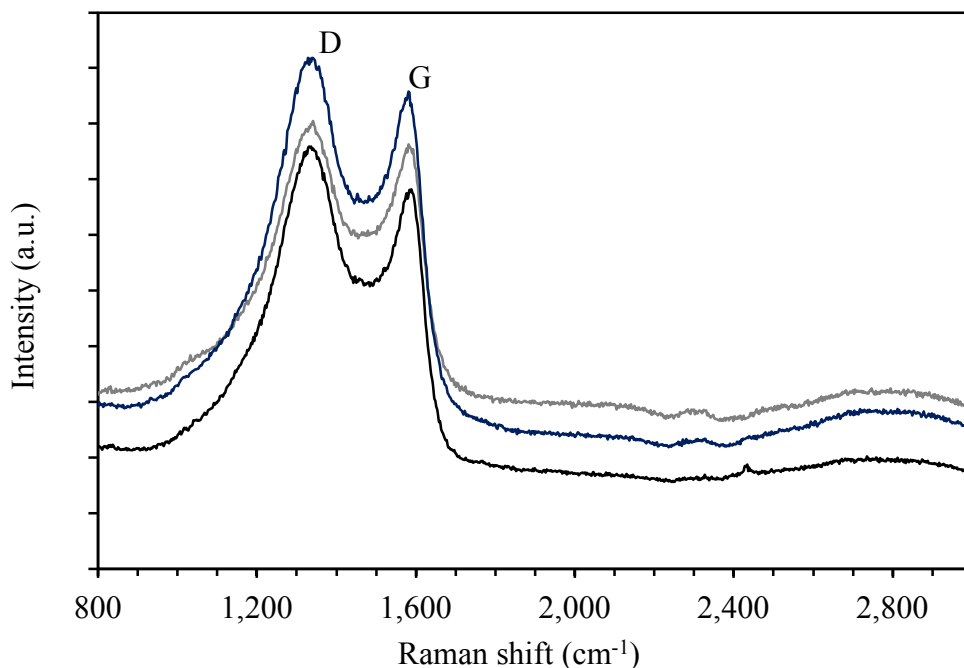

**Supplementary Figure 2 – Raman spectra for three independently prepared carbonized RMRs.** The units for the y-axis are arbitrary units (a.u.).

**Supplementary Table 1 – Raman shift for D-band (disorder) and G-band (graphitic) at five separate locations on three independently prepared samples.** Calculated  $I_d/I_g$  ratio was from peak intensity values.

| Measurement | Sample 1 |        |           | Sample 2 |        |           | Sample 3 |        |           |
|-------------|----------|--------|-----------|----------|--------|-----------|----------|--------|-----------|
|             | D-band   | G-band | $I_d/I_g$ | D-band   | G-band | $I_d/I_g$ | D-band   | G-band | $I_d/I_g$ |
| 1           | 1336     | 1588   | 1.12      | 1336     | 1586   | 1.12      | 1346     | 1593   | 1.14      |
| 2           | 1333     | 1588   | 1.06      | 1341     | 1591   | 1.12      | 1336     | 1580   | 1.15      |
| 3           | 1331     | 1583   | 1.14      | 1336     | 1581   | 1.09      | 1336     | 1586   | 1.14      |
| 4           | 1331     | 1578   | 1.05      | 1338     | 1591   | 1.12      | 1333     | 1579   | 1.13      |
| 5           | 1338     | 1583   | 1.09      | 1336     | 1583   | 1.10      | 1336     | 1579   | 1.09      |



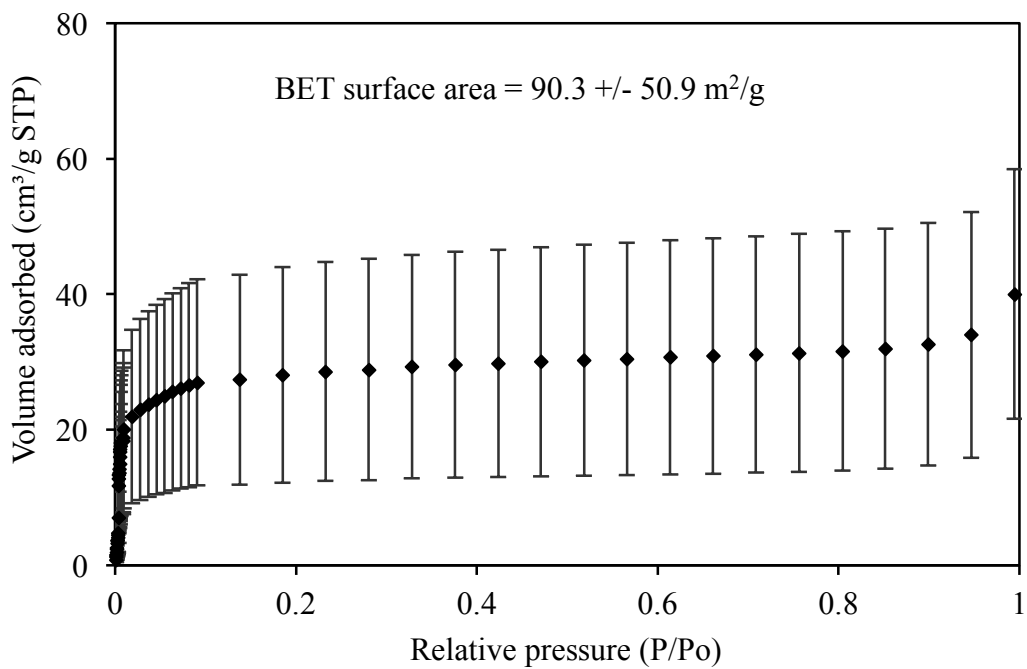

**Supplementary Figure 4 – Nitrogen adsorption isotherm for carbonized RMRs.**  
Mean +/- s.e.m., n=4 independent experiments.

**a**

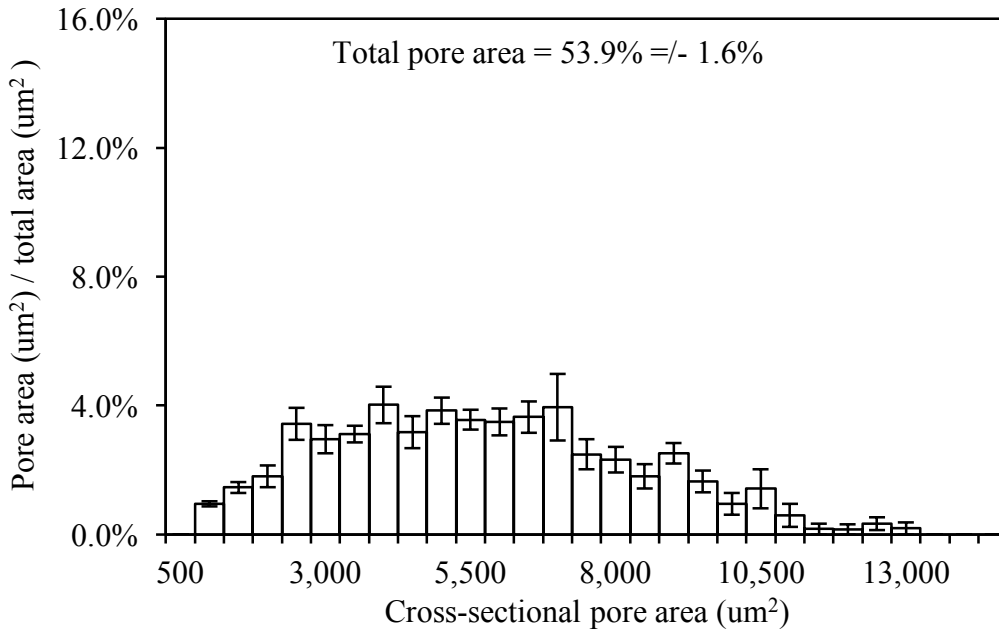

**b**

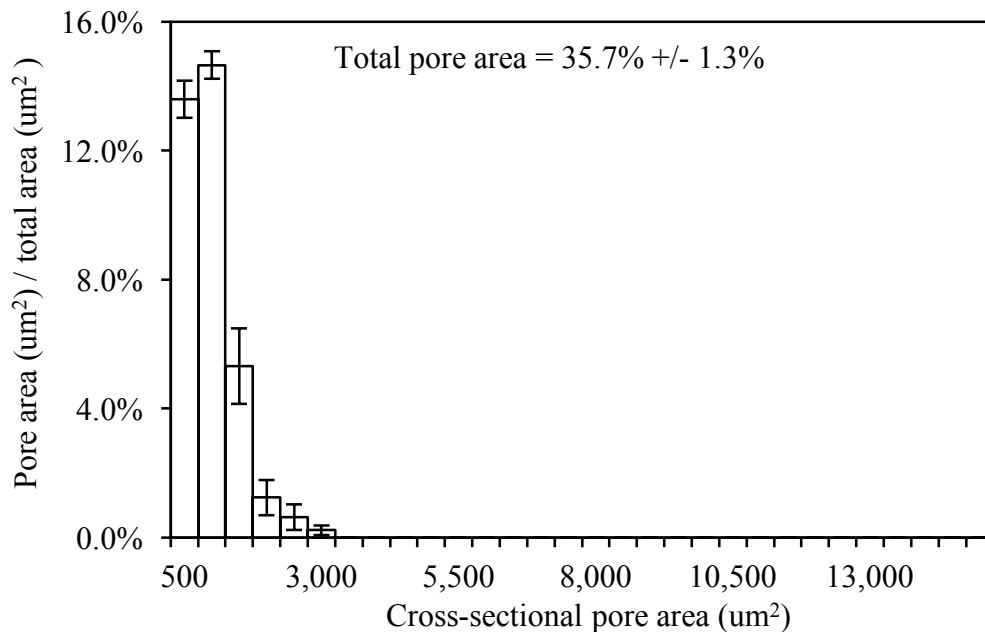

**Supplementary Figure 5 - Cross-sectional area distribution of tube-like structures in (a) the aerenchyma of carbonized RMR and (b) the secondary xylem of carbonized common woody biomass.** The average cross-sectional area of the tube-like structures in the carbonized RMR is approximately 10 times larger than that in the carbonized common woody biomass. Mean  $\pm$  s.e.m., n=5 (carbonized RMR) and n=3 (carbonized common woody biomass) independent experiments.

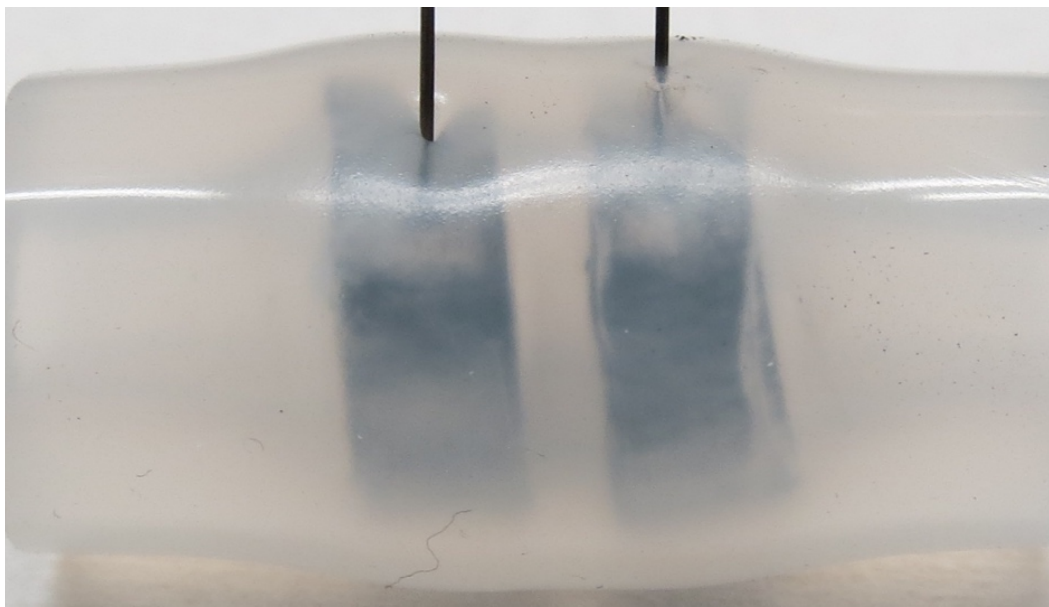

**Supplementary Figure 6 – Mangrove-based FT-CDI cell.** Two carbonized RMRs arranged in series in a custom-fabricated silicone coupling and connected to a power supply via 0.3 mm graphite rods.

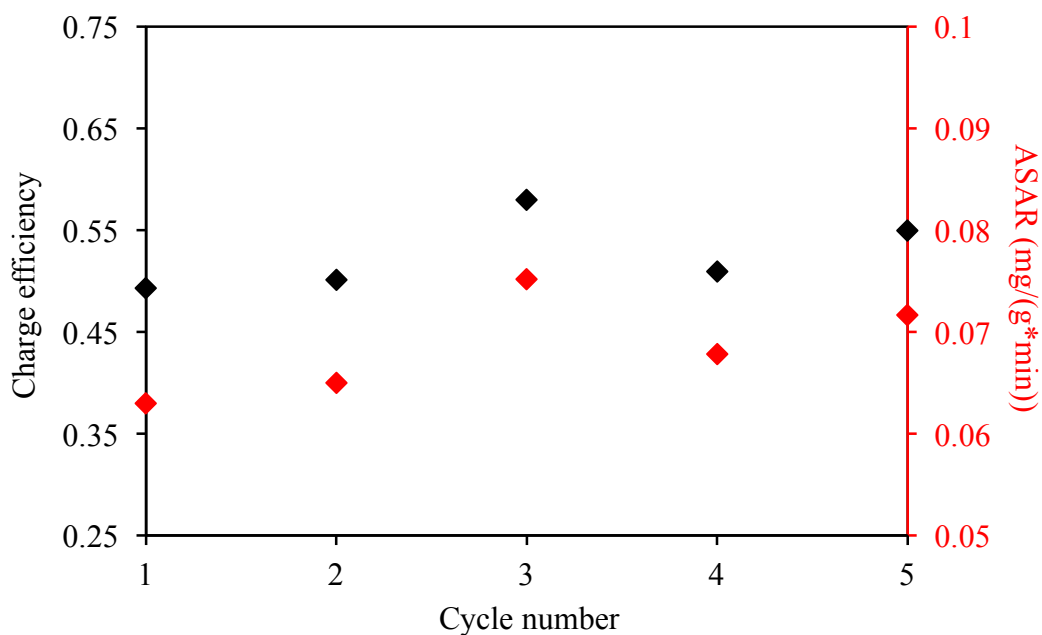

**Supplementary Figure 7 – Charge efficiency and average salt adsorption rate (ASAR) for each cycle during cyclic operation.** Charge efficiency (black diamonds) and ASAR (red diamonds) trended upward after first cycle.

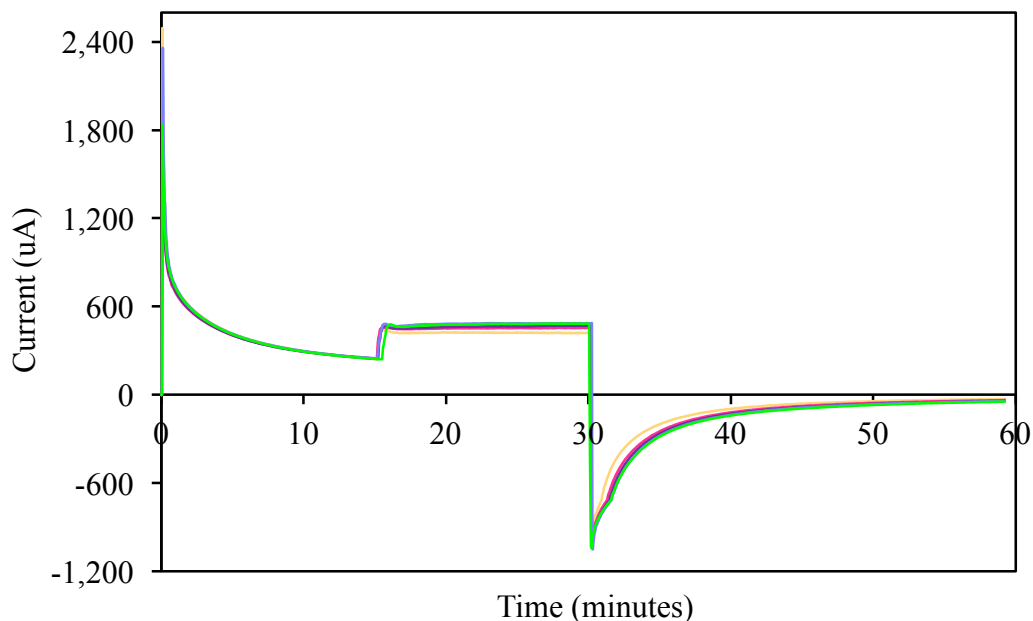

**Supplementary Figure 8 - Charge/discharge current response from cyclic operation of bioinspired FT-CDI system.** Initial capacitive current response for first 15 minutes corresponds to stopped-flow charging phase. Current response from 15 to 30 minutes corresponds to charging phase when flow is initiated (0.475 mL/min) while maintaining a potential of 1.5 V. Current response from 30 to 60 minutes corresponds to discharging phase at a flow rate of 0.475 mL/min and 0 V. (cycle 1 = orange; cycle 2 = pink; cycle 3 = purple, cycle 4 = light blue; cycle 5 = green)

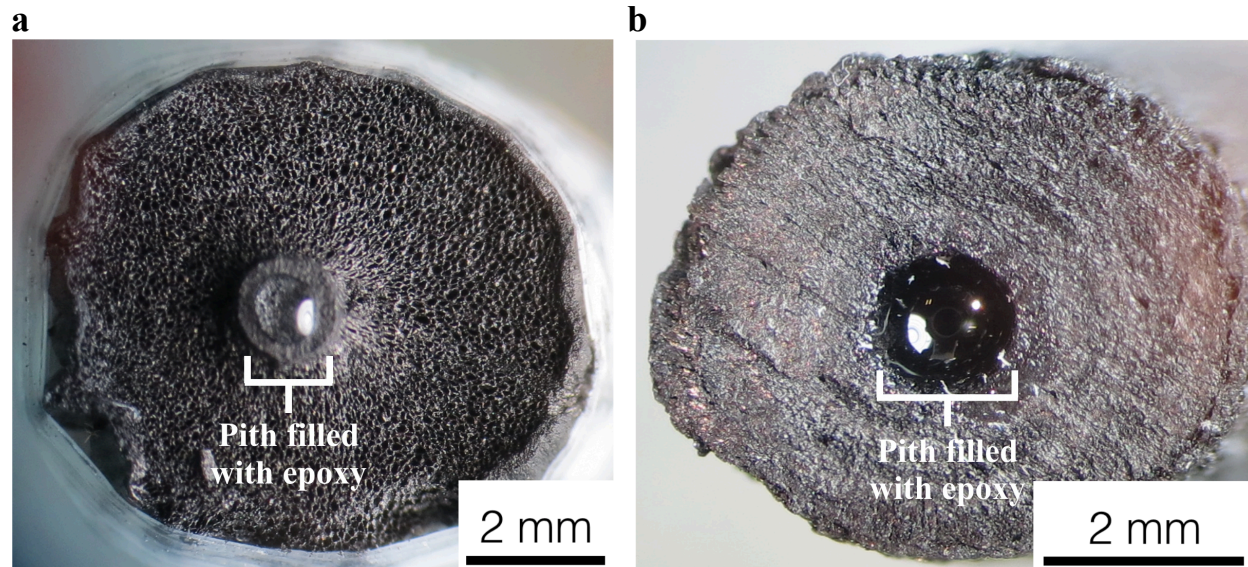

**Supplementary Figure 9 – Representative cross-sectional image of (a) carbonized RMR and (b) carbonized common woody biomass with epoxy filled pith.**



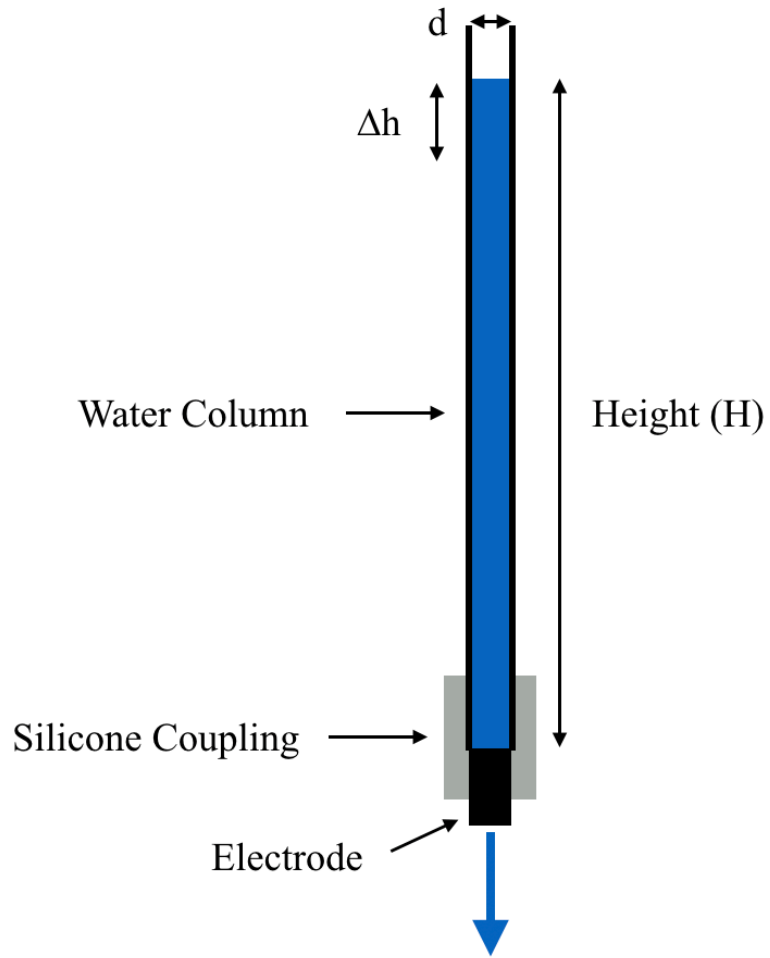

**Supplementary Figure 10 – Schematic of experimental setup for constant pressure hydraulic permeability experiments.**

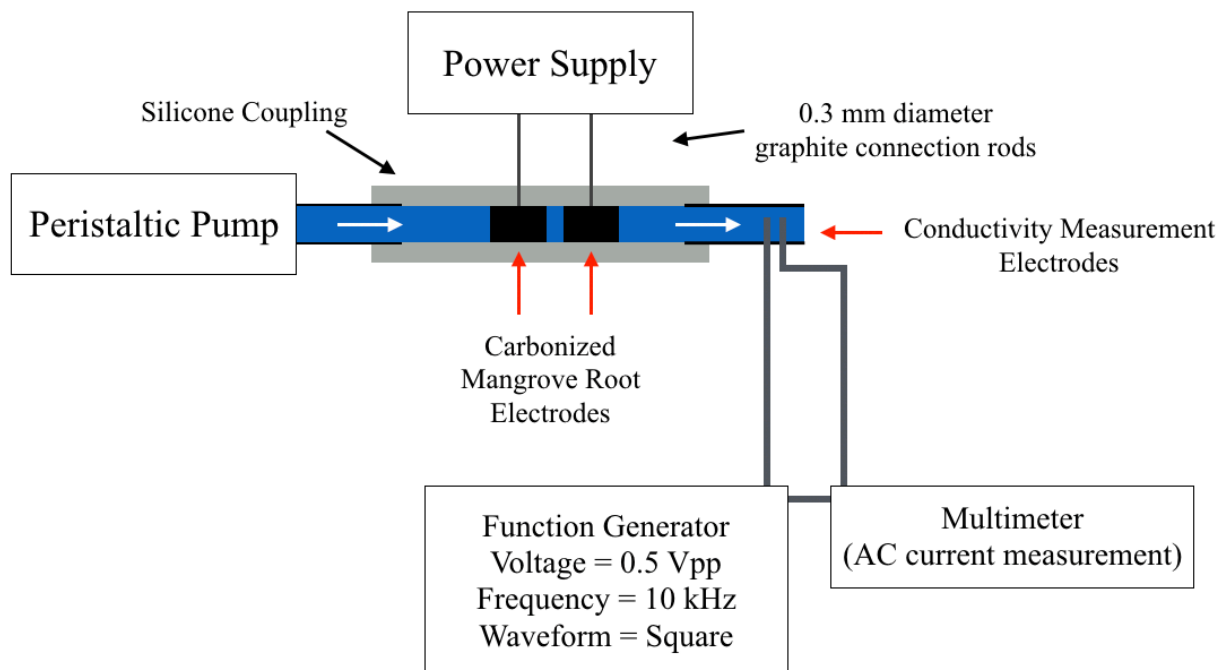

**Supplementary Figure 11 – Schematic of FT-CDI experimental setup utilizing carbonized RMRs as highly permeable electrodes.**

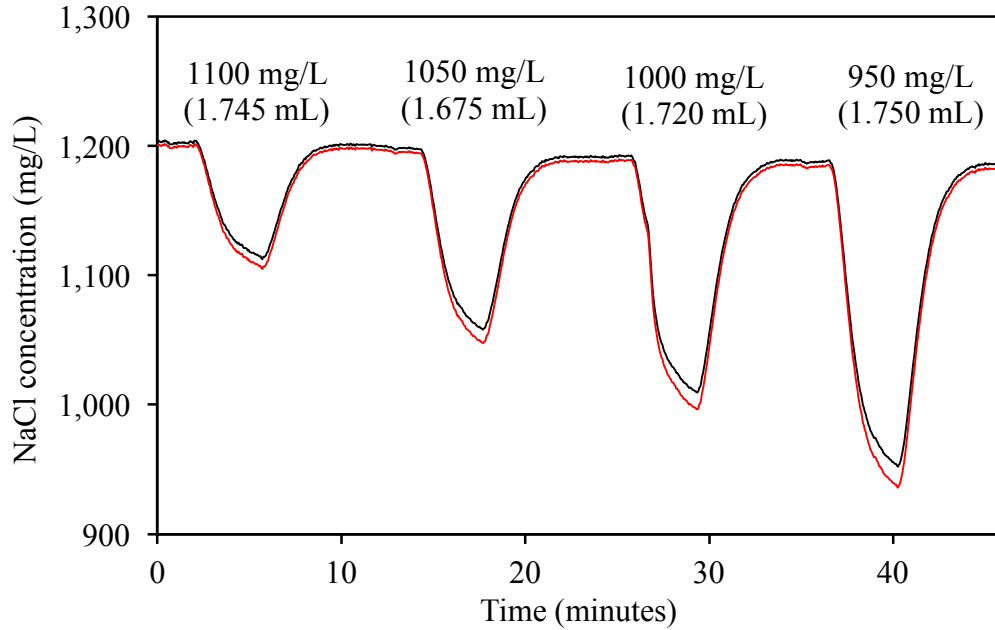

**Supplementary Figure 12 - NaCl adsorption and concentration reduction control experiment examining the accuracy of the adsorption calculation method and conductivity meter.** A 1200 mg/L NaCl solution was delivered through the flow-through capacitive deionization system in the absence of the carbonized red mangrove roots at a flow rate of 0.475 mL/min using a peristaltic pump. The inlet of the peristaltic pump was briefly inserted into a reservoir containing a NaCl solution of 1100, 1050, 1000, or 950 mg/L for approximately 3.7 minutes and then inserted back into the stock reservoir of 1200 mg/L. The reduction in NaCl concentration, which is similar to the concentration curves in Figure 4a, is indirectly measured using a flow-through conductivity meter and calculated from a calibration curve performed both before (Pre-run Calibration = black line) and after (Post-run Calibration = red line) the experiment shown above.

**Supplementary Table 3 – NaCl adsorption control calculation from Supplementary Figure 12.**

| NaCl (mg)     | 1100 mg/L<br>(1.745 mL) | 1050 mg/L<br>(1.675 mL) | 1000 mg/L<br>(1.720 mL) | 950 mg/L<br>(1.750 mL) |
|---------------|-------------------------|-------------------------|-------------------------|------------------------|
| Actual        | 0.175                   | 0.251                   | 0.344                   | 0.438                  |
| Pre-run Cal.  | 0.158                   | 0.234                   | 0.320                   | 0.431                  |
| Post-run Cal. | 0.168                   | 0.246                   | 0.340                   | 0.451                  |
| Error (%)     |                         |                         |                         |                        |
| Pre-run Cal.  | -9.3%                   | -6.9%                   | -6.9%                   | -1.6%                  |
| Post-run Cal. | -4.0%                   | -2.2%                   | -1.2%                   | 3.0%                   |

**Supplementary Table 4 – NaCl concentration reduction control from Supplementary Figure 12.**

| NaCl (mg/L)   | 1100 mg/L<br>(1.745 mL) | 1050 mg/L<br>(1.675 mL) | 1000 mg/L<br>(1.720 mL) | 950 mg/L<br>(1.750 mL) |
|---------------|-------------------------|-------------------------|-------------------------|------------------------|
| Actual        | 100                     | 150                     | 200                     | 250                    |
| Pre-run Cal.  | 90                      | 139                     | 181                     | 235                    |
| Post-run Cal. | 95                      | 146                     | 192                     | 249                    |
| Error (%)     |                         |                         |                         |                        |
| Pre-run Cal.  | -10.0%                  | -7.3%                   | -9.5%                   | -6.0%                  |
| Post-run Cal. | -5.0%                   | -2.7%                   | -4.0%                   | -0.4%                  |
